# Supplementary material for: Thioesterase-mediated side chain transesterification generates potent Gq signaling inhibitor FR900359
Source: PubMed Central journal article supplement (PMC7794379; doi:10.1038/s41467-020-20418-3), 2021-01-08
Supplement: 41467_2020_20418_MOESM2_ESM.pdf [file 41467_2020_20418_MOESM2_ESM.pdf]

## **Description of Additional Supplementary Files**

**Supplementary Data 1:** List of BGCs extracted from the BiG-FAM database (distance cutoff=1400) used for the BiG-SCAPE analysis. Dataset type, genome and BGC accession codes as well as BiG-SLiCE distance to *frs* are indicated.
